# Supplementary material
Source: PubMed Central journal article supplement (PMC10548297)
Supplement: jama-e2316893-s004.pdf [file jama-e2316893-s004.pdf]

## Data Sharing Statement

Blauenfeldt. Remote Ischemic Conditioning for Acute Stroke and Functional Outcome. *JAMA*. Published October 03, 2023. doi:10.1001/jama.2023.16893

### Data

**Data available:** Yes

**Data types:** Deidentified participant data

**How to access data:** Individual participant data that underlie results in this article will be shared after deidentification. Proposals should be directed at [rolfblau@rm.dk](mailto:rolfblau@rm.dk). To gain access, data requestors will need to sign a data processing agreement.

**When available:** With publication

### Supporting Documents

**Document types:** None

### Additional Information

**Who can access the data:** Individual participant data that underlie results in this article will be shared after deidentification. Proposals should be directed at [rolfblau@rm.dk](mailto:rolfblau@rm.dk). To gain access, data requestors will need to sign a data processing agreement.

**Types of analyses:** For any purpose

**Mechanisms of data availability:** Individual participant data that underlie results in this article will be shared after deidentification. Proposals should be directed at [rolfblau@rm.dk](mailto:rolfblau@rm.dk). To gain access, data requestors will need to sign a data processing agreement.
